# Supplementary material for: Targeting caveolae to pump bispecific antibody to TGF-β into diseased lungs enables ultra-low dose therapeutic efficacy
Source: PubMed Central journal article supplement (PMC9681080; doi:10.1371/journal.pone.0276462), 2022-11-22
Supplement: pone.0276462.s007.pdf [file pone.0276462.s007.pdf]

S1 Fig. Raw image of gel in Fig. 1 D

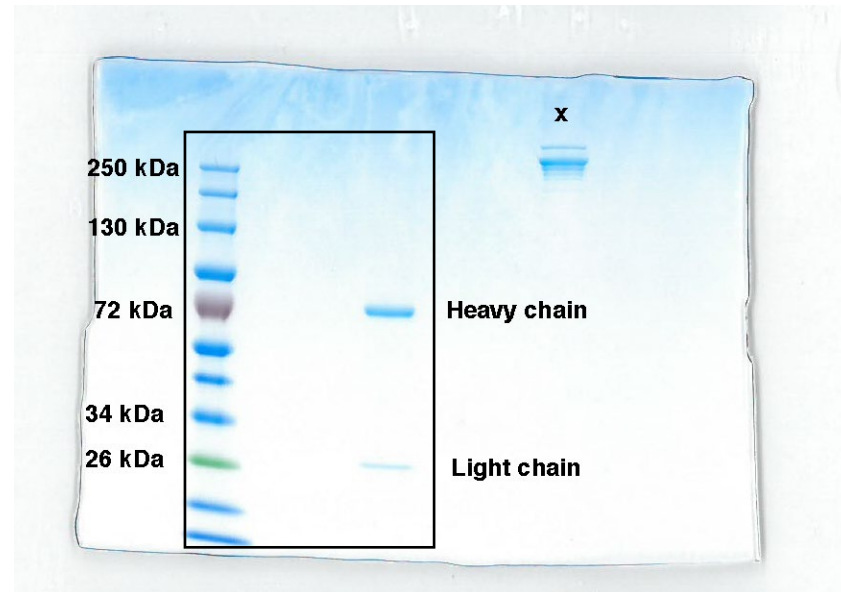

Black rectangle: Area shown in Fig. 1 D
