# Supplementary material for: Targeting caveolae to pump bispecific antibody to TGF-β into diseased lungs enables ultra-low dose therapeutic efficacy
Source: PubMed Central journal article supplement (PMC9681080; doi:10.1371/journal.pone.0276462), 2022-11-22
Supplement: pone.0276462.s008.pdf [file pone.0276462.s008.pdf]

**S5 Fig. Raw images of blots Figure 5**

**P-smad2/3 protein expression**

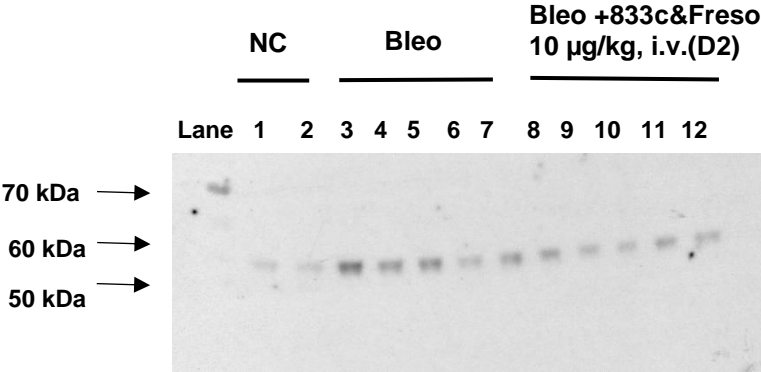

**Smad2/3 protein expression**

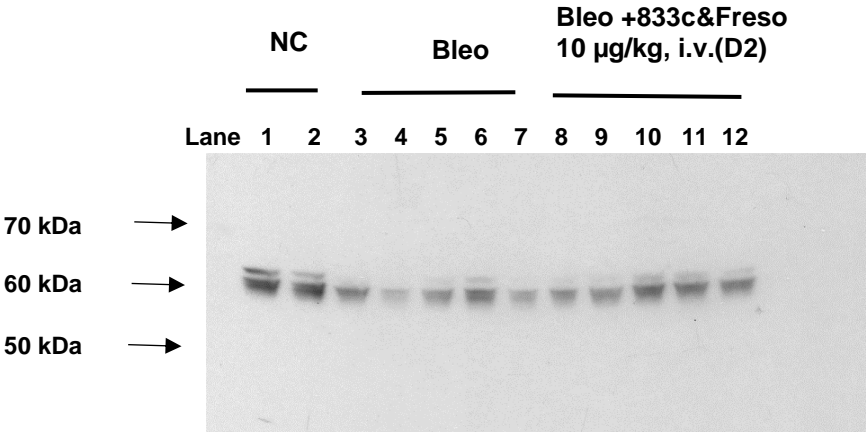

### Fibronectin protein expression

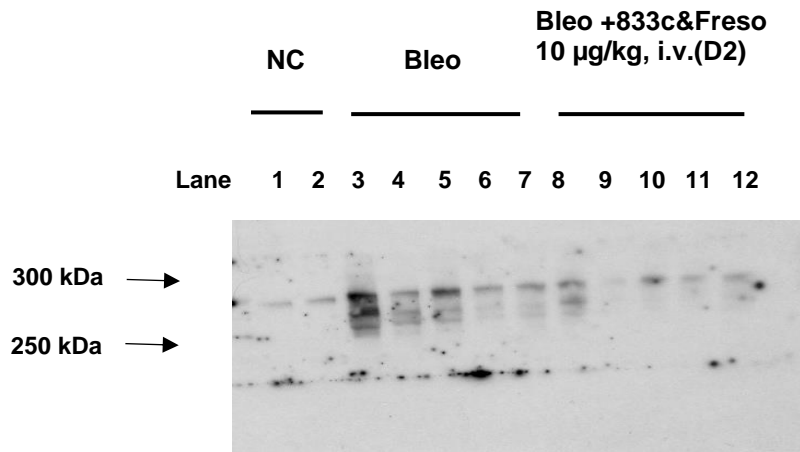

### Galectin-3 protein expression

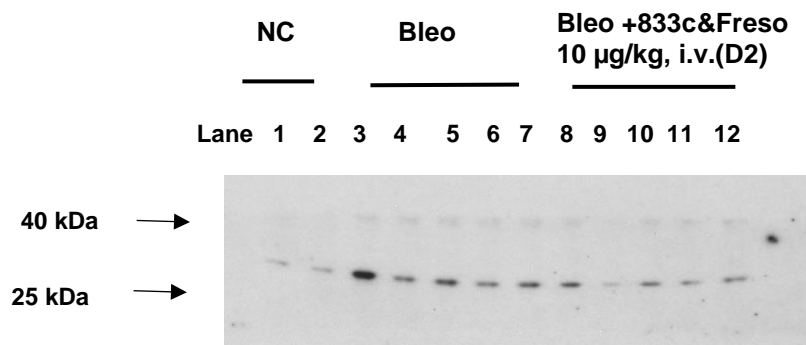

**GAPDH control**

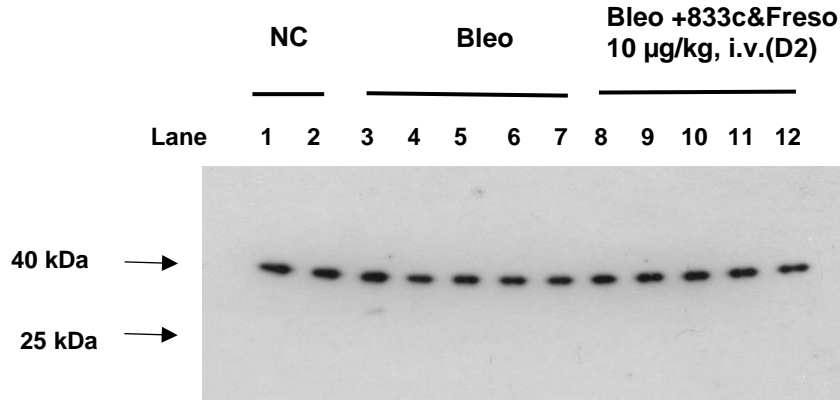

**Normal control (NC):** Lane 1, 2

**Bleo:** Lane 3, 4, 5, 6, 7

**Bleo +833c&Freso 10 µg/kg, i.v.(D2):** Lane 8, 9, 10, 11, 12
