# Supplementary material for: Targeting caveolae to pump bispecific antibody to TGF-β into diseased lungs enables ultra-low dose therapeutic efficacy
Source: PubMed Central journal article supplement (PMC9681080; doi:10.1371/journal.pone.0276462), 2022-11-22
Supplement: pone.0276462.s009.pdf [file pone.0276462.s009.pdf]

SS5 Fig. Raw images of blots figure S5.

PDGF receptor- $\beta$  protein expression

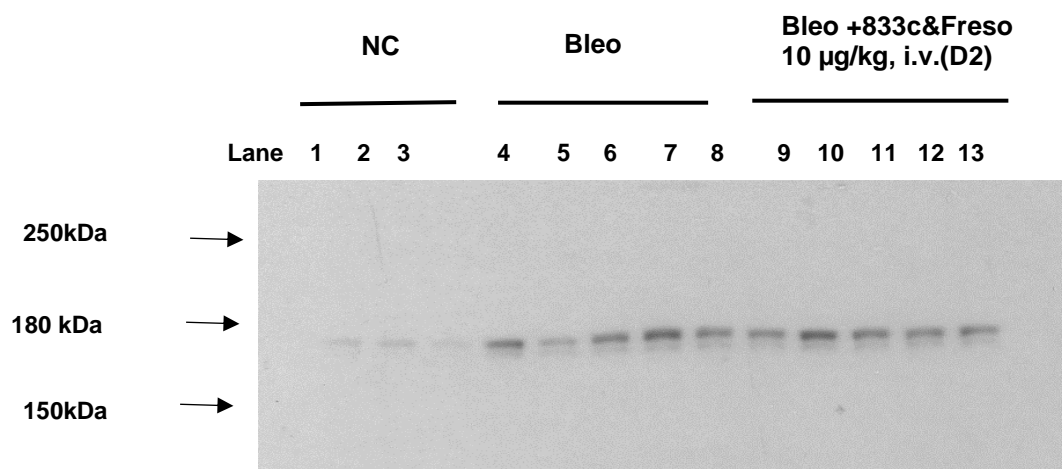

Phospho AKT (Thr-308) protein expression

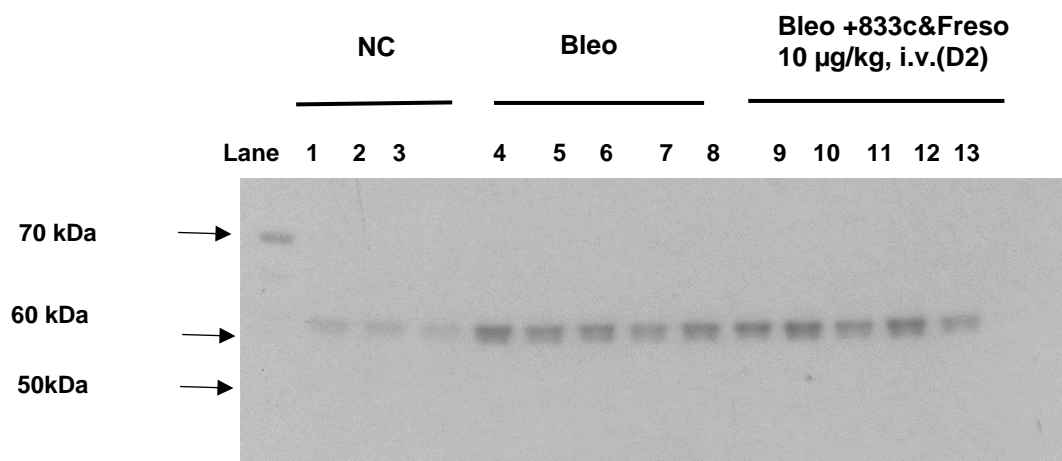

### AKT protein expression

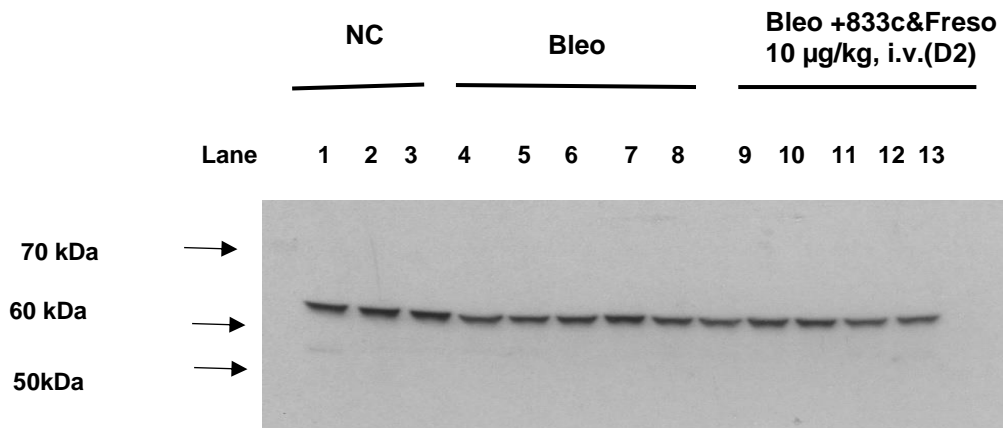

### Phospho p-70S6 Kinase (Thr389) protein expression

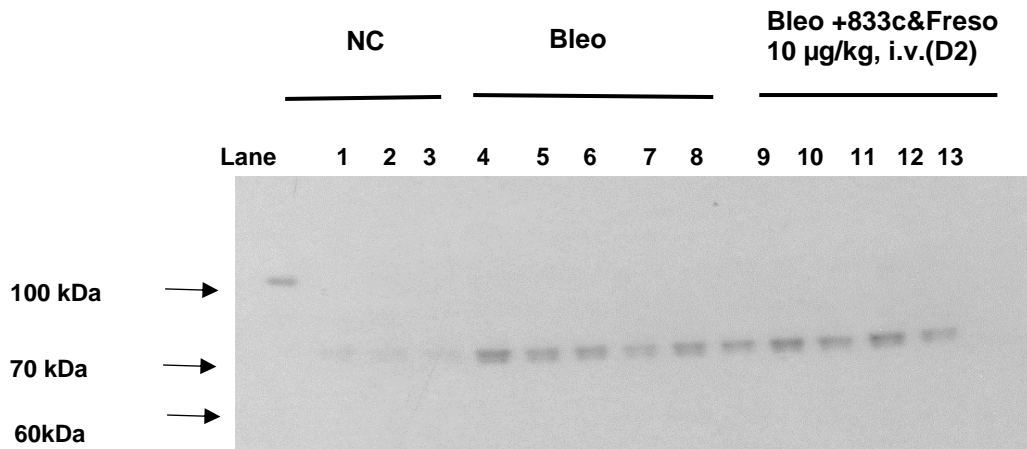

### p-70S6 Kinase protein expression

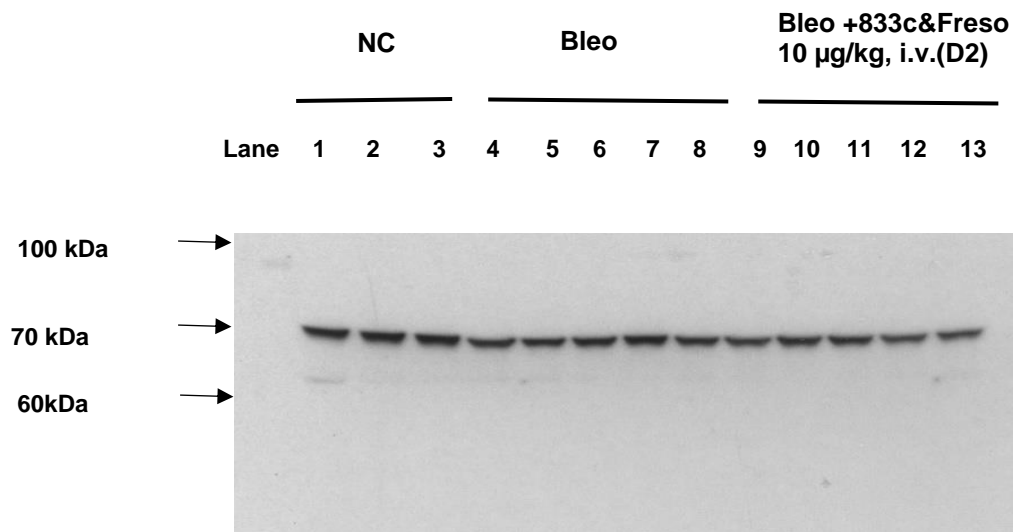

### GAPDH control

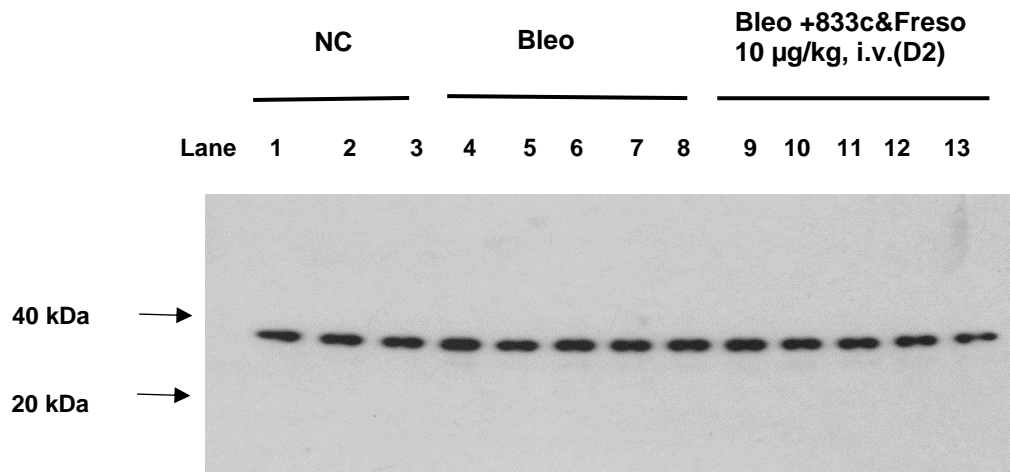

**Normal control (NC):** Lane 1, 2, 3

**Bleo:** Lane 4, 5, 6, 7, 8

**Bleo +833c&Freso 10 µg/kg, i.v.(D2):** Lane 9, 10, 11, 12, 13
